# Supplementary material for: Late Cretaceous sauropod tooth morphotypes may provide supporting evidence for faunal connections between North Africa and Southern Europe
Source: PeerJ. 2018 Nov 12;6:e5925. doi: 10.7717/peerj.5925 (PMC6237117; doi:10.7717/peerj.5925)
Supplement: Table S1 — Slenderness Index (SI) and Compression Index (CI) from pers. obs. or literature (see references). Tooth sample is mainly Late Jurassic or Cretaceous, with sauropod teeth from Europe, North America, South America, Asia, and Africa. [file peerj-06-5925-s001.xlsx]

## Sheet: Tabelle1
		Crown length (mm)	Maximum mesiodistal width (mm)	Maximum labiolingual width (mm)	SI	CI	Cross-section	Age	Site	Reference	Measured from Figure/Table
Malawisaurus		31	8.3	-	3.73494	-	?D-shaped/elliptic	Aptian	Mwakasyunguti (Malawi)	Gomani (2003)	Figure 7
		13.8	6.9	-	2	-	?D-shaped/elliptic	Aptian	Mwakasyunguti (Malawi)	Gomani (2003)	Figure 7
		25.5	7	-	3.64286	-	?D-shaped/elliptic	Aptian	Mwakasyunguti (Malawi)	Gomani (2003)	Figure 7
		34.5	6.2	-	5.56452	-	?D-shaped/elliptic	Aptian	Mwakasyunguti (Malawi)	Gomani (2003)	Figure 7
Karongasaurus	MAL-36	22.1	4.1	-	5.39024	-	?cyllindrical	Aptian	Mwakasyunguti (Malawi)	Gomani (2003)	Figure 7
	MAL-7	15.7	3.4	-	4.61765	-	?cyllindrical	Aptian	Mwakasyunguti (Malawi)	Gomani (2003)	Figure 7
	MAL-11	13.8	2.8	-	4.92857	-	?cyllindrical	Aptian	Mwakasyunguti (Malawi)	Gomani (2003)	Figure 7
									Mwakasyunguti (Malawi)	Gomani (2003)	Figure 7
Moroccan sample- Munich	BSPG 1993 IX 331A	60	12.3	10.5	4.87805	0.853659	cyllindrical	Cenomanian	Taouz, Kem Kem, Morocco	This work	Measured by FH & RM
	BSPG 1993 IX 331B	48	11.1	8.5	4.32432	0.765766	lemon-shaped	Cenomanian	Taouz, Kem Kem, Morocco	This work	Measured by FH & RM
	BSPG 1993 IX 331C	37	9	7.5	4.11111	0.833333	elliptic	Cenomanian	Taouz, Kem Kem, Morocco	This work	Measured by FH & RM
	BSPG 1993 IX 313A	27.5	8.2	6.2	3.35366	0.756098	lemon-shaped	Cenomanian	Taouz, Kem Kem, Morocco	This work	Measured by FH & RM
Algerian sample	BSPG 1993 IX 2A	51	11.5	9	4.43478	0.782609	lemon-shaped	Cenomanian	Algeria	This work	Measured by FH & RM
	BSPG 1993 IX 2B	47.5	13	9.2	3.65385	0.707692	D-shaped	Cenomanian	Algeria	This work	Measured by FH & RM
	BSPG 1993 IX 2C	47	11.5	10	4.08696	0.869565	elliptic/lemon-shaped	Cenomanian	Algeria	This work	Measured by FH & RM
	BSPG 1993 IX 2D	38	10.5	7.5	3.61905	0.714286	elliptic/lemon-shaped	Cenomanian	Algeria	This work	Measured by FH & RM
Moroccan sample - Zurich	PIMUZ A/III 0823 a	66	12	7	5.5	0.583333	D-shaped	Cenomanian	Erfoud, Kem Kem beds (Morocco)	This work	Measured by FH & RM
	PIMUZ A/III 0823 b	39	13	9	3	0.692308	elliptic	Cenomanian	Erfoud, Kem Kem beds (Morocco)	This work	Measured by FH & RM
	PIMUZ A/III 0823 c	57	9	6	6.33333	0.666667	lemon-shaped	Cenomanian	Erfoud, Kem Kem beds (Morocco)	This work	Measured by FH & RM
	PIMUZ A/III 0823 d	24	9	6	2.66667	0.666667	elliptic	Cenomanian	Erfoud, Kem Kem beds (Morocco)	This work	Measured by FH & RM
	PIMUZ A/III 0823 e	43	9	7	4.77778	0.777778	elliptic	Cenomanian	Erfoud, Kem Kem beds (Morocco)	This work	Measured by FH & RM
	PIMUZ A/III 0823 f	42	8	7	5.25	0.875	elliptic	Cenomanian	Erfoud, Kem Kem beds (Morocco)	This work	Measured by FH & RM
	PIMUZ A/III 0823 g	31	6	5	5.16667	0.833333	lemon-shaped	Cenomanian	Erfoud, Kem Kem beds (Morocco)	This work	Measured by FH & RM
	PIMUZ A/III 0823 h	26	6	4.5	4.33333	0.75	cyllindrical	Cenomanian	Erfoud, Kem Kem beds (Morocco)	This work	Measured by FH & RM
	PIMUZ A/III 0823 i	21	5.5	4	3.81818	0.727273	elliptic/cyllindrical	Cenomanian	Erfoud, Kem Kem beds (Morocco)	This work	Measured by FH & RM
	PIMUZ A/III 0823 j	34	9	10	3.77778	1.11111	D-shaped	Cenomanian	Erfoud, Kem Kem beds (Morocco)	This work	Measured by FH & RM
Rapetosaurus	UA 8698	51.4	7.7	6,8	7.55882	1.13235	cyllindrical	Maastrichtian	Mahajanga Basin (Madagascar)	Curry Rogers (2004)	Figure 32
	UA 8699	27.7	7.7	6.8	9.23333	2.56667	cyllindrical	Maastrichtian	Mahajanga Basin (Madagascar)	Curry Rogers (2004)	Figure 32
Atsinganosaurus	MHN-Aix-PV.1999.21	16	4	3	4	0.75	lemon-shaped	upper Campanian	Velaux-la Bastide Neuve (France)	Díez Díaz et al. (2013)	Measured by VDD
	MHN-Aix-PV.1999.22	20	5	4.5	4	0.9	lemon-shaped	upper Campanian	Velaux-la Bastide Neuve (France)	Díez Díaz et al. (2013)	Measured by VDD
	MHN-Aix-PV.1999.48	24.5	5.5	4.5	4.45455	0.818182	lemon-shaped	upper Campanian	Velaux-la Bastide Neuve (France)	Díez Díaz et al. (2013)	Measured by VDD
	MMS/VBN.12.A.006	19	3.3	2.3	5.75758	0.69697	lemon-shaped	upper Campanian	Velaux-la Bastide Neuve (France)	Díez Díaz et al. (2018)	Measured by VDD
	MMS/VBN.12.B.14	18	4.5	-	4	-	lemon-shaped	upper Campanian	Velaux-la Bastide Neuve (France)	Díez Díaz et al. (2018)	Measured by VDD
	MMS/VBN.12.A.07	16	3.7	3.3	4.32432	0.891892	lemon-shaped	upper Campanian	Velaux-la Bastide Neuve (France)	Díez Díaz et al. (2018)	Measured by VDD
	MMS/VBN.93.33	15	3.9	-	3.84615	-	lemon-shaped	upper Campanian	Velaux-la Bastide Neuve (France)	Díez Díaz et al. (2018)	Measured by VDD
Fox-Amphoux-Métisson Cylindrical Morphotype	FAM 03.06	19.11	4.39	4.65	4.35308	1.05923	cyllindrical	upper Campanian	Fox-Amphoux-Métisson (France)	Díez Díaz et al. (2012)	Measured by VDD
	FAM 03.11	17.3	4.27	3.7	4.05152	0.866511	cyllindrical	upper Campanian	Fox-Amphoux-Métisson (France)	Díez Díaz et al. (2012)	Measured by VDD
	FAM 04.17	17.49	3.45	3.88	5.06957	1.12464	cyllindrical	upper Campanian	Fox-Amphoux-Métisson (France)	Díez Díaz et al. (2012)	Measured by VDD
Fox-Amphoux-Métisson D-shaped cross-section Morphotype	FAM 03.55	14.98	3.93	3.13	3.8117	0.796438	D-shaped	upper Campanian	Fox-Amphoux-Métisson (France)	Díez Díaz et al. (2012)	Measured by VDD
	FAM 03.62	-	4.58	3.45	-	0.753275	D-shaped	upper Campanian	Fox-Amphoux-Métisson (France)	Díez Díaz et al. (2012)	Measured by VDD
	FAM 03.08	24.15	9.36	6.63	2.58013	0.708333	D-shaped	upper Campanian	Fox-Amphoux-Métisson (France)	Díez Díaz et al. (2012)	Measured by VDD
	FAM 03.200	25.81	8.89	6.28	2.90326	0.706412	D-shaped	upper Campanian	Fox-Amphoux-Métisson (France)	Díez Díaz et al. (2012)	Measured by VDD
	FAM 04.16	24.8	8.64	6.68	2.87037	0.773148	D-shaped	upper Campanian	Fox-Amphoux-Métisson (France)	Díez Díaz et al. (2012)	Measured by VDD
	FAM 04.18	19.62	7.52	5.31	2.60904	0.706117	D-shaped	upper Campanian	Fox-Amphoux-Métisson (France)	Díez Díaz et al. (2012)	Measured by VDD
Lirainosaurus	MCNA 1854	-	6.6	5.9	-	0.893939	cyllindrical	upper Campanian	Laño (Spain)	Díez Díaz et al. (2013)	Measured by VDD
	MCNA 13867	-	7.3	6.5	-	0.890411	cyllindrical	upper Campanian	Laño (Spain)	Díez Díaz et al. (2013)	Measured by VDD
	MCNA 13878	16.9	4.2	3.5	4.02381	0.833333	cyllindrical	upper Campanian	Laño (Spain)	Díez Díaz et al. (2013)	Measured by VDD
	MCNA 14238	24.8	7.1	7.1	3.49296	1	cyllindrical	upper Campanian	Laño (Spain)	Díez Díaz et al. (2013)	Measured by VDD
	MCNA 14239	-	7.4	7.3	-	0.986486	cyllindrical	upper Campanian	Laño (Spain)	Díez Díaz et al. (2013)	Measured by VDD
Lo Hueco Morphotype A	HUE-90	46	10.5	9	4.38095	0.857143	elliptic/cyllindrical	upper Campanian-lower Maastrichtian	Lo Hueco (Spain)	Díez Díaz et al. (2014)	Measured by VDD
	HUE-685	37	11	6.5	3.36364	0.590909	elliptic/cyllindrical	upper Campanian-lower Maastrichtian	Lo Hueco (Spain)	Díez Díaz et al. (2014)	Measured by VDD
	HUE-1212	-	10.5	7	-	0.666667	elliptic/cyllindrical	upper Campanian-lower Maastrichtian	Lo Hueco (Spain)	Díez Díaz et al. (2014)	Measured by VDD
	HUE-1636	-	9.5	5.5	-	0.578947	elliptic/cyllindrical	upper Campanian-lower Maastrichtian	Lo Hueco (Spain)	Díez Díaz et al. (2014)	Measured by VDD
	HUE-3793	-	10	7	-	0.7	elliptic/cyllindrical	upper Campanian-lower Maastrichtian	Lo Hueco (Spain)	Díez Díaz et al. (2014)	Measured by VDD
	HUE-4723	23	7.5	5	3.06667	0.666667	elliptic/cyllindrical	upper Campanian-lower Maastrichtian	Lo Hueco (Spain)	Díez Díaz et al. (2014)	Measured by VDD
	HUE-6155	18.9	5.5	3.9	3.43636	0.709091	elliptic/cyllindrical	upper Campanian-lower Maastrichtian	Lo Hueco (Spain)	Díez Díaz et al. (2014)	Measured by VDD
	HUE-6809	19	5	4	3.8	0.8	elliptic/cyllindrical	upper Campanian-lower Maastrichtian	Lo Hueco (Spain)	Díez Díaz et al. (2014)	Measured by VDD
	HUE-8743	-	10	7	-	0.7	elliptic/cyllindrical	upper Campanian-lower Maastrichtian	Lo Hueco (Spain)	Díez Díaz et al. (2014)	Measured by VDD
Lo Hueco Morphotype B	HUE-540	17	4.2	4.5	4.04762	1.07143	cyllindrical	upper Campanian-lower Maastrichtian	Lo Hueco (Spain)	Díez Díaz et al. (2014)	Measured by VDD
	HUE-2687	25	5	4.1	5	0.82	cyllindrical	upper Campanian-lower Maastrichtian	Lo Hueco (Spain)	Díez Díaz et al. (2014)	Measured by VDD
	HUE-4040	-	6	3.5	-	0.583333	cyllindrical	upper Campanian-lower Maastrichtian	Lo Hueco (Spain)	Díez Díaz et al. (2014)	Measured by VDD
	HUE-4148	19.8	5	4	3.96	0.8	cyllindrical	upper Campanian-lower Maastrichtian	Lo Hueco (Spain)	Díez Díaz et al. (2014)	Measured by VDD
	HUE-6942	24	4.8	3.9	5	0.8125	cyllindrical	upper Campanian-lower Maastrichtian	Lo Hueco (Spain)	Díez Díaz et al. (2014)	Measured by VDD
	HUE-7041	14.5	4	3	3.625	0.75	cyllindrical	upper Campanian-lower Maastrichtian	Lo Hueco (Spain)	Díez Díaz et al. (2014)	Measured by VDD
Lo Hueco Unknown Morphotype	HUE-5498	-	3	2.5	-	0.833333	elliptic/cyllindrical	upper Campanian-lower Maastrichtian	Lo Hueco (Spain)	Díez Díaz et al. (2014)	Measured by VDD
	HUE-5809	-	2.5	2	-	0.8	elliptic/cyllindrical	upper Campanian-lower Maastrichtian	Lo Hueco (Spain)	Díez Díaz et al. (2014)	Measured by VDD
	HUE-6889	9.5	2.1	1.8	4.52381	0.857143	elliptic/cyllindrical	upper Campanian-lower Maastrichtian	Lo Hueco (Spain)	Díez Díaz et al. (2014)	Measured by VDD
Massecaps Titanosaur	M39	31	8.6	7.2	3.60465	0.837209	elliptic/cyllindrical	lower Maastrichtian	Massecaps (France)	Díez Díaz et al. (2013)	Measured by VDD
	M289	33.9	10.3	7.4	3.29126	0.718447	elliptic/cyllindrical	lower Maastrichtian	Massecaps (France)	Díez Díaz et al. (2013)	Measured by VDD
	M1964	30.4	8.6	7.2	3.53488	0.837209	elliptic/cyllindrical	lower Maastrichtian	Massecaps (France)	Díez Díaz et al. (2013)	Measured by VDD
Ampelosaurus	MDE C3-52	21	6	3.3	3.5	0.55	elliptic/cyllindrical	lower Maastrichtian	Bellevue (France)	Díez Díaz et al. (2013)	Measured by VDD
Demandasaurus	MDS RV II 437	30	10	5	3	0.5	lemon-shaped	late Barremian-early Aptian	Burgos Spain	Torcida Baldor et al (2011)	Figure 4
	MDS RV II 438	38,3	11,7	8,3	3.2735	0.709402	lemon-shaped	late Barremian-early Aptian	Burgos Spain	Torcida Baldor et al (2011)	Figure 4
Europatitan	MDS OT II 18	25	11,7	7	2.13675	0.598291	elliptic/cyllindrical	late Barremian-early Aptian	Burgos Spain	Torcida Baldor et al (2017)	Figure 3
Patagosaurus	MACN-CH 2008.1	32,6	19,8	7,5	1.64646	0.378788	D-shaped	Aalenian-Bajocian	Cerro Condor (Patagonia, Argentina)	Holwerda et al. (2015)	Measured by FH
	MACN-CH 2008.2	17,8	15	8,2	1.18667	0.546667	D-shaped	Aalenian-Bajocian	Cerro Condor (Patagonia, Argentina)	Holwerda et al. (2015)	Measured by FH
	MACN-CH 2008.3	31,3	19,4	13,75	1.6134	0.708763	D-shaped	Aalenian-Bajocian	Cerro Condor (Patagonia, Argentina)	Holwerda et al. (2015)	Measured by FH
	MACN-CH 2009	17,9	15	6,7	1.19333	0.446667	D-shaped	Aalenian-Bajocian	Cerro Condor (Patagonia, Argentina)	Holwerda et al. (2015)	Measured by FH
	MPEF-PV 3058	29,7	20,1	8,2	1.47761	0.40796	D-shaped	Aalenian-Bajocian	Cerro Condor (Patagonia, Argentina)	Holwerda et al. (2015)	Measured by FH
	MPEF-PV 3059	20	14,3	10,9	1.3986	0.762238	D-shaped	Aalenian-Bajocian	Cerro Condor (Patagonia, Argentina)	Holwerda et al. (2015)	Measured by FH
	MPEF-PV 3060	24,1	16,6	8,75	1.45181	0.527108	D-shaped	Aalenian-Bajocian	Cerro Condor (Patagonia, Argentina)	Holwerda et al. (2015)	Measured by FH
	MPEF-PV 3061	34,9	18,5	12,5	1.88649	0.675676	D-shaped	Aalenian-Bajocian	Cerro Condor (Patagonia, Argentina)	Holwerda et al. (2015)	Measured by FH
Lapparentosaurus	MAA 198	24	10	18	2.4	1.8	D-shaped	Bathonian	Madagascar	Läng 2008 + FH obs	Measured by FH
	MAA 196	18	8	15	2.25	1.875	D-shaped	Bathonian	Madagascar	Läng 2008 + FH obs	Measured by FH
sauropod indet	NMS.G.2004.31.1	14,1	8,9	4,7	1.58427	0.52809	D-shaped	Bajocian	Isle of Skye, UK	Barrett (2006)	Figure 1
sauropod indet	MPEF-PV 10606	24	10	16	2.4	1.6	D-shaped	Aalenian-Bajocian	Cerro Condor (Patagonia, Argentina)	Carballido et al., (2017)	Measured by JLC
sauropod indet	MPEF-PV 10860	6,4	3,3	1,9	1.93939	0.575758	D-shaped	Aalenian-Bajocian	Canadon Asfalto Fm (Patagonia Argentina)	Becerra et al., (2017)	Measured by MB
Euhelopus	PMU M2983	26,3	13,8	10	1.9058	0.724638	elliptic		Liaoning, China	Upchurch and Barrett (2000)	Figure 4.3
	IVPP V15010.1	48,5	18,5	12,5	2.62162	0.675676	D-shaped	Aptian	Liaoning, China	Barrett & Wang (2007)	Figure 1
	IVPP V15010.2	35	16,2	12,6	2.16049	0.777778	D-shaped	Aptian	Liaoning, China	Barrett & Wang (2007)	Figure 1
	IVPP V15010.3	32,3	19,8	12	1.63131	0.606061	D-shaped	Aptian	Liaoning, China	Barrett & Wang (2007)	Figure 1
	IVPP V15010.4	25,4	16,2	10	1.5679	0.617284	D-shaped	Aptian	Liaoning, China	Barrett & Wang (2007)	Figure 1
	IVPP V15010.5	20,8	13,4	7,5	1.55224	0.559701	D-shaped	Aptian	Liaoning, China	Barrett & Wang (2007)	Figure 1
Mongolosaurus	AMNH 6710	15,3	3,9	3,7	3.92308	0.948718	cyllindrical	Aptian-Albian	Inner Mongolia, China	Mannion (2011)	Figure 4
	AMNH 6710	14,4	5,4	4,7	2.66667	0.87037	D-shaped	Aptian-Albian	Inner Mongolia, China	Mannion (2011)	Figure 4
Nigersaurus	MNN GDF 512	25	4	-	6.25	-	cyllindrical	Aptian-Albian	Niger	Sereno & Wilson (2005)	Figure 5.7
	MNN GDF 512	20	3	-	6.66667	-	cyllindrical	Aptian-Albian	Niger	Sereno & Wilson (2005)	Figure 5.7
Tapuiasaurus	MZSP-PV 807	15,3	4,1	-	3.73171	-	elliptic	Aptian	Brazil	Zaher et al., (2011)	Figure 2
	MZSP-PV 807	35,3	6	-	5.88333	-	elliptic	Aptian	Brazil	Zaher et al., (2011)	Figure 2
	MZSP-PV 807	41,1	11,8	-	3.48305	-	elliptic	Aptian	Brazil	Zaher et al., (2011)	Figure 2
Nemegtosaurus	Z PAL MgD-I/9	56,3	10,9	10	5.16514	0.917431	cyllindrical	Late(st) Cretaceous	Mongolia	Wilson (2005)	Figure 5
	Z PAL MgD-I/10	36	8	8	4.5	1	cyllindrical	Late(st) Cretaceous	Mongolia	Wilson (2005)	Figure 5
Phuwiangosaurus	?	31,8	6,4		4.96875		cyllindrical	Early Cretaceous	Thailand	Buffetaut et al., (2002)	Figure 4
	?	40,9	6,4		6.39062	0	cyllindrical	Early Cretaceous	Thailand	Buffetaut et al., (2002)	Figure 4
	?	38,2	7,3		5.23288		cyllindrical	Early Cretaceous	Thailand	Buffetaut et al., (2002)	Figure 4
	?	27,3	7		3.9		cyllindrical	Early Cretaceous	Thailand	Buffetaut et al., (2002)	Figure 4
euhelopodid' sauropod thailand	?	35,7	17,2		2.07558		D-shaped	Early Cretaceous	Thailand	Buffetaut et al., (2002)	Figure 2
nemegtosaurid' sauropod thailand	?	31,8	14,3		2.22378		cyllindrical	Albian	Thailand	Buffetaut et al., (2002)	Figure 8
?titanosauria indet	LINHM 003	53	12	9	4.41667	0.75	elliptic	Albian-Cenomanian	Ksar es Souk Province, Morocco	Kellner (1997)	Figure 2
Toba sauropod	?	17	8,7	7,3	1.95402	0.83908	lemon-shaped	Aptian - Turonian	Japan	Saegusa & Tomida (2011)	Table 1
Kohisa sauropod	IMCF 959	29	6,7	5,3	4.32836	0.791045	lemon-shaped	Aptian - Turonian	Japan	Saegusa & Tomida (2011)	Table 1
	IMCF 1122	14	5,3	4,7	2.64151	0.886792	cyllindrical	Aptian - Turonian	Japan	Saegusa & Tomida (2011)	Table 1
Sasayama sauropod	?	44	8	6	5.5	0.75	elliptic	Aptian - Turonian	Japan	Saegusa & Tomida (2011)	Table 1
	?	38,6	8	6,7	4.825	0.8375	elliptic	Aptian - Turonian	Japan	Saegusa & Tomida (2011)	Table 1
titanosauriformes indet	SBEI 183	63	30	21	2.1	0.7	D-shaped	Lower Cretaceous	Shiramine, Japan	Barrett et al., (2002)	Plate 1
	SBEI 13	69	21	15	3.28571	0.714286	D-shaped	Lower Cretaceous	Shiramine, Japan	Barrett et al., (2002)	Plate 1
	SBEI 583	21,5	15	11	1.43333	0.733333	D-shaped	Lower Cretaceous	Shiramine, Japan	Barrett et al., (2002)	Plate 1
	SBEI 160	85,5	27	21	3.16667	0.777778	D-shaped	Lower Cretaceous	Shiramine, Japan	Barrett et al., (2002)	Plate 1
Alamosaurus	UNM FKK 034	31,5	15	12	2.1	0.8	D-shaped	Upper Cretaceous	New Mexico USA	Kues et al (1980)	Figure 2
Abydosaurus	DINO 16488	35	8	9	4.375	1.125	D-shaped	APTIAN-ALBIAN	UTAH USA	Chure et al (2010)	Supplementary Table
Astrodon	USNM ??	32	10	10	3.2	1	D-shaped	Lower Cretaceous	Cloverly Fm USA	Carpenter and Tidwell (2005)	Figure 3.2
	USNM ??	22	7	5	3.14286	0.714286	D-shaped	Lower Cretaceous	Cloverly Fm USA	Carpenter and Tidwell (2005)	Figure 3.2
	USNM ??	19	5	3	3.8	0.6	D-shaped	Lower Cretaceous	Cloverly Fm USA	Carpenter and Tidwell (2005)	Figure 3.2
	USNM ??	23	5	4	4.6	0.8	D-shaped	Lower Cretaceous	Cloverly Fm USA	Carpenter and Tidwell (2005)	Figure 3.2
Auca Mahuevo Embryo titanosaur	MCF-PVPH-770	0,45	0,13	0,06	3.46154	0.461538	cyllindrical	early-middle Campanian	Auca Mahuevo Argentina	Garcia & Cerda (2010)	Figure 2
Auca Mahuevo Adult titanosaur	MCF-PVPH-774	2,3	0,75	0,3	3.06667	0.4	cyllindrical	early-middle Campanian	Auca Mahuevo Argentina	Garcia & Cerda (2010)	Figure 3
Petrobasaurus	MAU-Pv-PH-449/1	36	5,7	4,3	6.31579	0.754386	cyllindrical	Santonian	Neuquen Argentina	Fillipi et al., (2011)
Ligabuesaurus	MCF-PVPH-233	18	7	4	2.57143	0.571429		Aptian-albian	Neuquen Argentina	Bonaparte et al (2006)	Figure 2
Limaysaurus (Rebbachisaurus)	MUC-Pv 205	27	4	3	6.75	0.75	cyllindrical	Aptian Albian	Neuquen Argentina	Calvo & Salgado (1995)	Figure 6C
Bauru titanosauriform	MN 5013-V	23	5	4	4.6	0.8	cyllindrical	Late Cretaceous	Bauru Fm, Brazil	Kellner (2006)	Figure 1
Rinconsaurus	MRS-Pv 117	32,5	8,8	5,9	3.69318	0.670455	lemonshaped	Late Cretaceous	Patagonia Argentina	Calvo & Gonzalez Riga (2003)	Plate I
Jobaria	??	24	16	12,7	1.5	0.79375	D-shaped	Lower Cretaceous	Niger	Sereno et al (1999)	Figure 2
Brachiosauridae indet	KS 7002	35	15	12,7	2.33333	0.846667	D-shaped	Lower Cretaceous	South Korea	Lim et al (2001)	Figure 1
Brachiosauridae indet	MA-MTG 2	18,1	6,1	5,6	2.96721	0.918033	D-shaped	Cenomanian	Western France	Vullo et al (2007)	Figure 4A-C
Rebbachisauridae indet	MACN-PV N100	30,8	6,9	4,6	4.46377	0.666667	lemon-shaped	Barremian	Neuquen Argentina	Apesteguia (2007)	Figure 3 A-E
Dicraeosauridae indet	MACN-PV N101	22,5	4,5	2,5	5	0.555556	cyllindrical	Barremian	Neuquen Argentina	Apesteguia (2007)	Figure 3 F-I
Titanosauriform indet	MACN-PV N102	15,2	3,2	2	4.75	0.625	cyllindrical	Barremian	Neuquen Argentina	Apesteguia (2007)	Figure 4
	MACN-PV N97	30	10	8	3	0.8	cyllindrical	Barremian	Neuquen Argentina	Apesteguia (2007)	Figure 4
	MACN-PV N98	27	15	9	1.8	0.6	elliptic/lemon	Barremian	Neuquen Argentina	Apesteguia (2007)	Figure 4
	MACN-PV N68	25	15	11	1.66667	0.733333	Dshaped	Barremian	Neuquen Argentina	Apesteguia (2007)	Figure 4
	MACN-PV N99	28	8	6	3.5	0.75	elliptic	Barremian	Neuquen Argentina	Apesteguia (2007)	Figure 4
Uzbekistan (neo)sauropoda indet	ZIN PH 2384/16	10	2,5	1,8	4	0.72	cyllindrical/elliptical	Turonian	Uzbekistan	Averianov & Sues (2016)	Table 1
	ZIN PH 2389/16	10,6	2,6	1,9	4.07692	0.730769	cyllindrical/elliptical	Turonian	Uzbekistan	Averianov & Sues (2016)	Table 1
	ZIN PH 2385/16	11,4	2,2	2,3	5.18182	1.04545	cyllindrical/elliptical	Turonian	Uzbekistan	Averianov & Sues (2016)	Table 1
	ZIN PH 2380/16	13	3,8	3,1	3.42105	0.815789	cyllindrical/elliptical	Turonian	Uzbekistan	Averianov & Sues (2016)	Table 1
	ZIN PH 2388/16	13,7	3,5	2,7	3.91429	0.771429	cyllindrical/elliptical	Turonian	Uzbekistan	Averianov & Sues (2016)	Table 1
	ZIN PH 2382/16	14	3,4	2,2	4.11765	0.647059	cyllindrical/elliptical	Turonian	Uzbekistan	Averianov & Sues (2016)	Table 1
	ZIN PH 2383/16	14,3	2,4	1,9	5.95833	0.791667	cyllindrical/elliptical	Turonian	Uzbekistan	Averianov & Sues (2016)	Table 1
	ZIN PH 2390/16	16,5	4,5	3,5	3.66667	0.777778	cyllindrical/elliptical	Turonian	Uzbekistan	Averianov & Sues (2016)	Table 1
	ZIN PH 2387/16	17,5	3,4	3,1	5.14706	0.911765	cyllindrical/elliptical	Turonian	Uzbekistan	Averianov & Sues (2016)	Table 1
	ZIN PH 2381/16	17,9	4,7	3,8	3.80851	0.808511	cyllindrical/elliptical	Turonian	Uzbekistan	Averianov & Sues (2016)	Table 1
Huabeisaurus	HBV 20001 A	67	13	11	5.15385	0.846154	subcyllindrical	Upper Cretaceous	Shanxi, China	D'Emic et al (2013)	Table 1
	HBV 20001 B	45	11	9,5	4.09091	0.863636	subcyllindrical	Upper Cretaceous	Shanxi, China	D'Emic et al (2013)	Table 1
Maxakalisaurus	MBC-38-PV	45	6,7	5	6.71642	0.746269	cyllindrical	Upper Cretaceous	Bauru, Brazil	Franca et al (2016)	Figure 2
	MBC-38-PV	36,7	6,8	6	5.39706	0.882353	cyllindrical	Upper Cretaceous	Bauru, Brazil	Franca et al (2016)	Figure 2
	MBC-38-PV	45	6,9	7	6.52174	1.01449	cyllindrical	Upper Cretaceous	Bauru, Brazil	Franca et al (2016)	Figure 2
	MBC-38-PV	46,7	6,10	8	7.65574	1.31148	cyllindrical	Upper Cretaceous	Bauru, Brazil	Franca et al (2016)	Figure 2
	MBC-38-PV	38,3	6,11	9	6.26841	1.473	cyllindrical	Upper Cretaceous	Bauru, Brazil	Franca et al (2016)	Figure 2
titanosaur/titanosauriform indet	UFMA 1.20.418	48	13	8,5	3.69231	0.653846	cyllindrical	Upper Cretaceous	Bauru, Brazil	Carvalho Freire et al (2007)	Figure 2
	UFMA 1.20.472	43	14	7,5	3.07143	0.535714	subcyllindrical	Upper Cretaceous	Bauru, Brazil	Carvalho Freire et al (2007)	Figure 2
	UFMA 1.20.473	53,5	14,5	9	3.68966	0.62069	lemonshaped	Upper Cretaceous	Bauru, Brazil	Carvalho Freire et al (2007)	Figure 2
